# Supplementary material
Source: Frontiers journal article supplement (https://www.frontiersin.org/articles/536120)

## *Supplementary Material*

### **1 Supplementary Figures and Tables**

**Table S1** Frequency of intake of selected food groups in 61 women from a conflict zone.

| <b>A. Weekly intake, n</b> | <b>Everyday</b>  | <b>&gt;3 d/week</b> | <b>1-3 d/week</b> | <b>1 time/week</b> | <b>Occasionally</b> | <b>Never</b>     |
|----------------------------|------------------|---------------------|-------------------|--------------------|---------------------|------------------|
| Eggs                       | 41               | 14                  | 2                 | 2                  | 1                   | 1                |
| Dairy products             | 28               | 8                   | 7                 | 4                  | 11                  | 35               |
| Legumes                    | 20               | 17                  | 11                | 5                  | 4                   | 4                |
| Nuts/Avocados              | 8                | 2                   | 9                 | 7                  | 16                  | 19               |
| Viscera                    | 2                | 2                   | 8                 | 8                  | 16                  | 25               |
| Processed/can meats        | 0                | 3                   | 3                 | 6                  | 12                  | 37               |
| Junk food                  | 4                | 2                   | 5                 | 4                  | 18                  | 28               |
| <b>B. Daily intake, n</b>  | <b>3 times/d</b> | <b>2 times/d</b>    |                   | <b>1 time/d</b>    |                     | <b>No intake</b> |
| Fruits and vegetables      | 22.9             | 27.9                |                   | 34.4               |                     | 14.7             |

**Table S2** Correlations between the degree of food insecurity and elements of the adapted stress questionnaire, the Colombian biopsychosocial risk score and of the diet with stress variables

| Food insecurity scale and adapted stress questionnaire |                | Food insecurity scale and biopsychosocial risk score |               | Food insecurity scale and weekly intake of foods |               |
|--------------------------------------------------------|----------------|------------------------------------------------------|---------------|--------------------------------------------------|---------------|
| Recalling stressful events                             | 0.31*          | Emotional tension                                    | 0.40**        | Dairy products                                   | -0.29*        |
| Anxiety-like symptoms                                  | 0.29*          | Depressive mood                                      | 0.44***       | Nuts, avocados                                   | -0.26*        |
| No interest in daily activities                        | 0.58****       | Neurovegetative symptoms                             | 0.30*         | Legumes                                          | -0.29*        |
| Not feeling love towards relatives and friends         | 0.38**         | Family support                                       | -0.27*        | Fruits and vegetables                            | -0.31*        |
| Easily startled                                        | 0.30*          |                                                      |               |                                                  |               |
| Difficulty in sleeping                                 | 0.36**         |                                                      |               |                                                  |               |
| <b>Stress score</b>                                    | <b>0.47***</b> | <b>Biopsychosocial risk</b>                          | <b>0.39**</b> | <b>Food groups score</b>                         | <b>-0.29*</b> |

\* P <0.05, \*\* P <0.01, \*\*\* P <0.001, \*\*\*\* P <0.0001

**Table S3** Bootstrap standard error and normal, percentile and bias-estimated confidence intervals using 50 bootstrap replications for models of symphysis-fundal height (SFH) Z-scores, and sonography-estimated fetal weight with an estimate of their bias.

| <b>A. SFH Z-score</b>                               | <b>Observed coefficient</b> | <b>Bias</b> | <b>Bootstrap SE</b> | <b>Bootstrap normal-based CI</b> | <b>Bootstrap percentile CI</b> | <b>Bootstrap bias-corrected CI</b> |
|-----------------------------------------------------|-----------------------------|-------------|---------------------|----------------------------------|--------------------------------|------------------------------------|
| History of displacement                             | -0.99                       | -0.03       | 0.31                | -1.60, -0.38                     | -1.61, -0.45                   | -1.53, -0.30                       |
| MAP, centile                                        | 0.57                        | -0.02       | 0.22                | 0.13, 1.01                       | 0.13, 0.91                     | 0.18, 1.13                         |
| Hemoglobin, grams/dL                                | 0.30                        | 0.02        | 0.11                | 0.09, 0.52                       | 0.15, 0.54                     | 0.15, 0.54                         |
| <b>B. SFH Z-score</b>                               |                             |             |                     |                                  |                                |                                    |
| History of displacement                             | -1.15                       | -0.001      | 0.32                | -1.77, -0.53                     | -1.73, -0.48                   | -1.73, -0.48                       |
| Diastolic blood pressure, centile                   | 0.91                        | 0.003       | 0.20                | 0.52, 1.30                       | 0.52, 1.22                     | 0.52, 1.22                         |
| Taking iron supplements                             | 0.61                        | 0.004       | 0.26                | 0.09, 1.13                       | 0.19, 1.19                     | 0.20, 1.29                         |
| Hematocrit, %                                       | 0.09                        | 0.001       | 0.03                | 0.03, 0.16                       | 0.03, 0.15                     | 0.04, 0.18                         |
| <b>C. Sonography-estimated fetal weight Z-score</b> |                             |             |                     |                                  |                                |                                    |
| Stress score (0-3)                                  | -0.16                       | 0.01        | 0.19                | -0.53, 0.21                      | -0.52, 0.15                    | -0.58, 0.15                        |
| SFH Z-scores                                        | 0.26                        | 0.006       | 0.07                | 0.12, 0.40                       | 0.13, 0.39                     | 0.07, 0.39                         |
| Hours of sleep <sup>5</sup>                         | -0.36                       | 0.007       | 0.11                | -0.59, -0.14                     | -0.57, -0.13                   | -0.57, -0.13                       |
| Aspirin intake                                      | -0.48                       | 0.010       | 0.23                | -0.93, -0.02                     | -0.79, 0.007                   | -0.79, 0.15                        |

## 2 Supplementary Figures

**Supplementary Figure 1.** Predicted probability of amniotic fluid index (AFI) (low-medium-high) by (A) severity of lack of interest in daily activities controlling for gestational age and maternal age and (B) low family support, controlling for gestational age and intake of folic acid supplements.

A

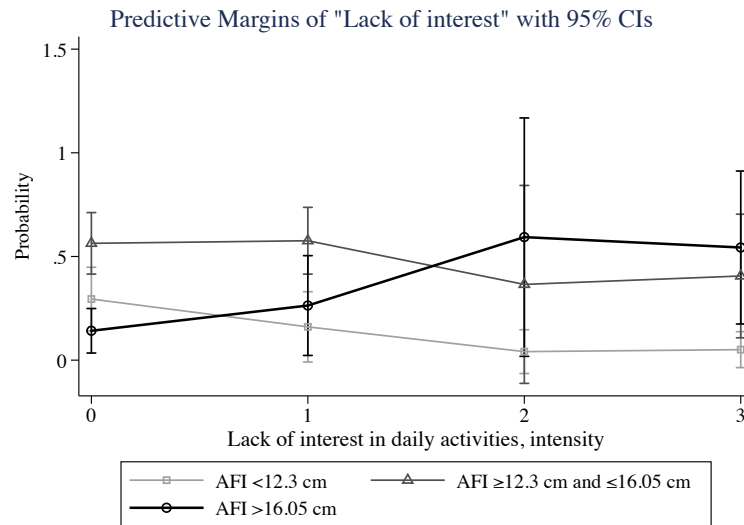

B

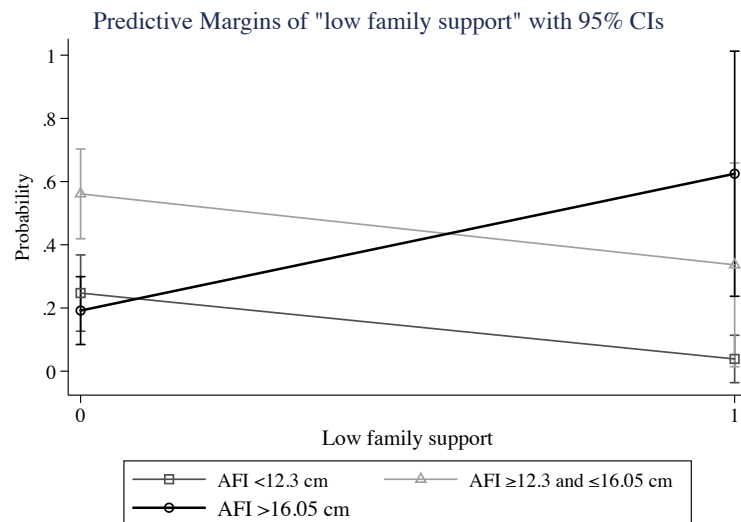

Supplement: Data_Sheet_1.PDF [file Data_Sheet_1.PDF]
